# Supplementary material for: Knowledge, attitudes, and practice of pelvic floor dysfunction and pelvic floor ultrasound among women of childbearing age in Sichuan, China
Source: Frontiers journal article supplement (doi:10.3389/fpubh.2023.1160733), 2023-05-10
Supplement: Image_1.pdf [file Image_1.pdf]

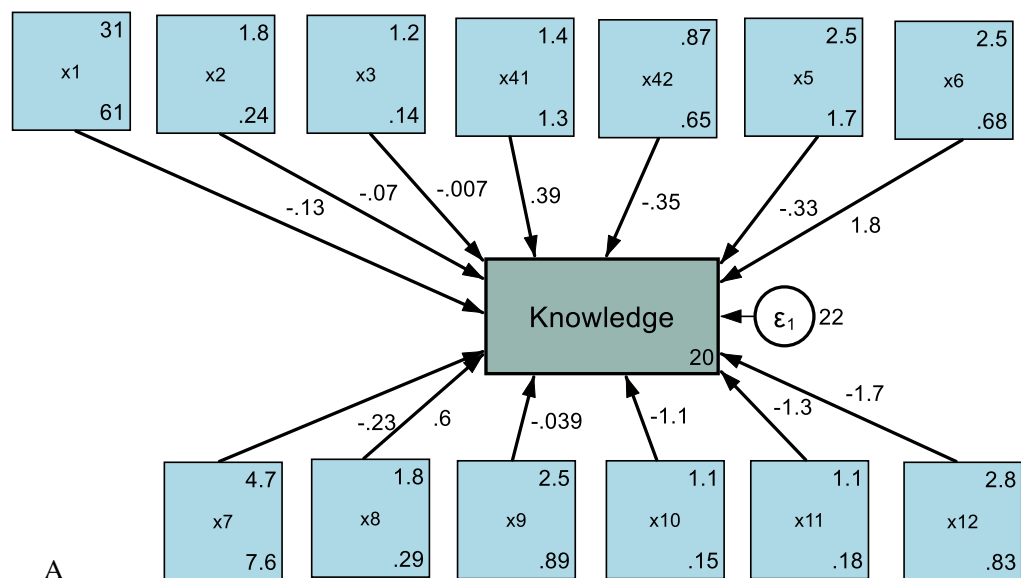

A

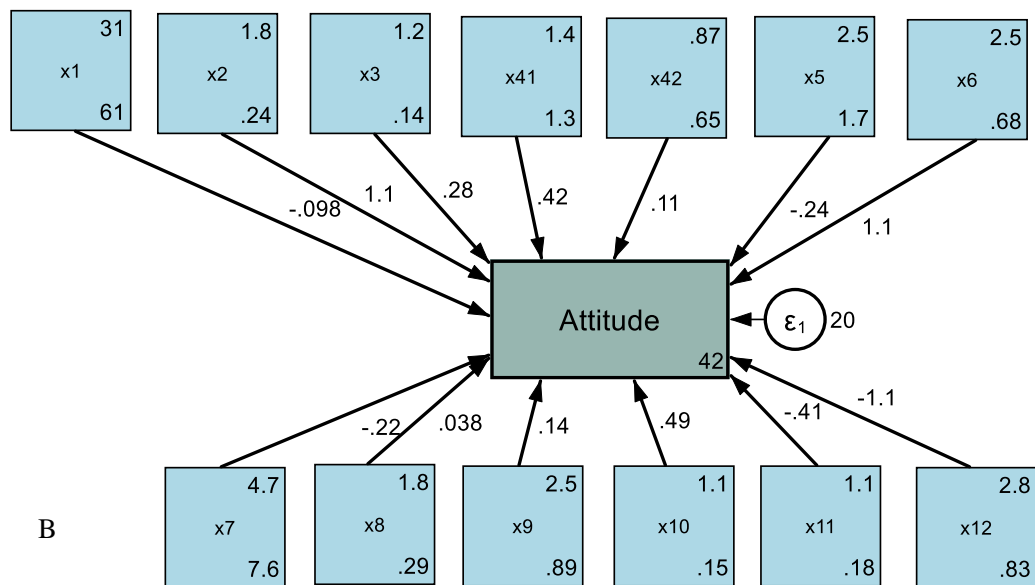

B

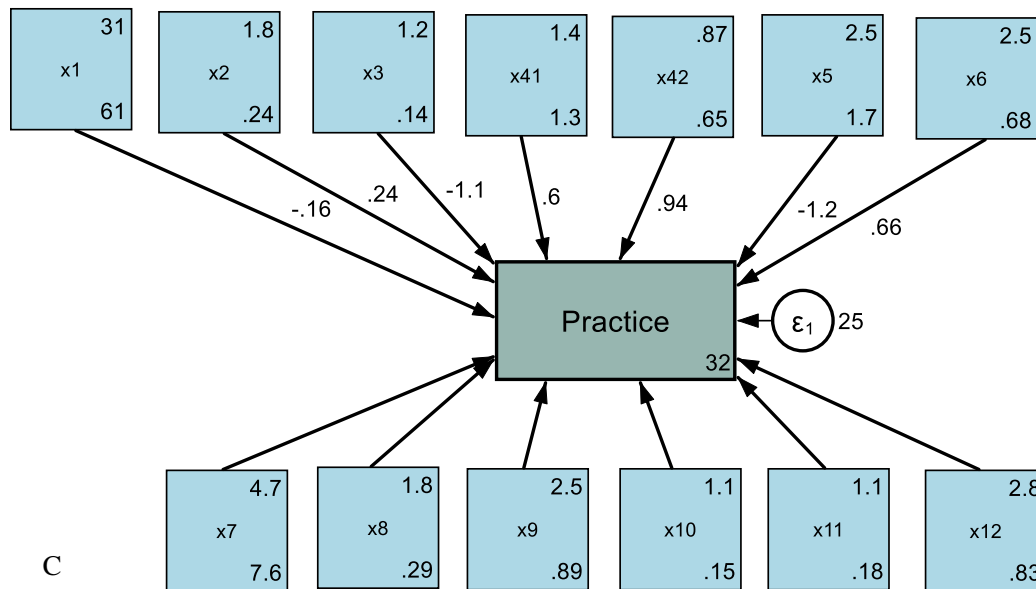

**Figure S1.** The SEM model of knowledge (A), attitude (B) and practice (C). x1: Age; x2: Marital status; x3: Sexually active; x41: Gravidity; x42: Parity; x5: Mode of delivery; x6: Education; x7: Occupation; x8: Residency; x9: Household's monthly capita income; x10: Smoking; x11: Alcohol drinking; x12: Pelvic floor dysfunction diagnosed.
